# Supplementary material for: Antihypertensive medications ameliorate Alzheimer's disease pathology by slowing its propagation
Source: PubMed Central journal article supplement — Alzheimers Dement (N Y). 2020 Aug 13;6(1):e12060. doi: 10.1002/trc2.12060 (PMC7424255; doi:10.1002/trc2.12060), 2020-08-13
Supplement: TRC2-6-e12060-s001.pdf [file TRC2-6-e12060-s001.pdf]

**Anti-hypertensive medications ameliorate Alzheimer disease  
pathology by slowing its propagation**

Andrew J. Affleck<sup>a,b</sup>, Perminder S. Sachdev<sup>c</sup>, Julia Stevens<sup>d</sup>, Glenda M. Halliday<sup>a,e,f\*</sup>

<sup>a</sup>Neuroscience Research Australia (NeuRA), Randwick, NSW, Australia

<sup>b</sup>School of Psychiatry, University of New South Wales, NSW, Australia

<sup>c</sup>Centre for Healthy Brain Ageing (CHeBA), School of Psychiatry, University of New  
South Wales, NSW, Australia

<sup>d</sup>Discipline of Pathology, Sydney Medical School, University of Sydney, NSW,  
Australia

<sup>e</sup>School of Medical Sciences, University of New South Wales, NSW, Australia

<sup>f</sup>Brain and Mind Centre, Sydney Medical School, University of Sydney, NSW,  
Australia

**Supplementary Figure 1.** Case selection flow chart

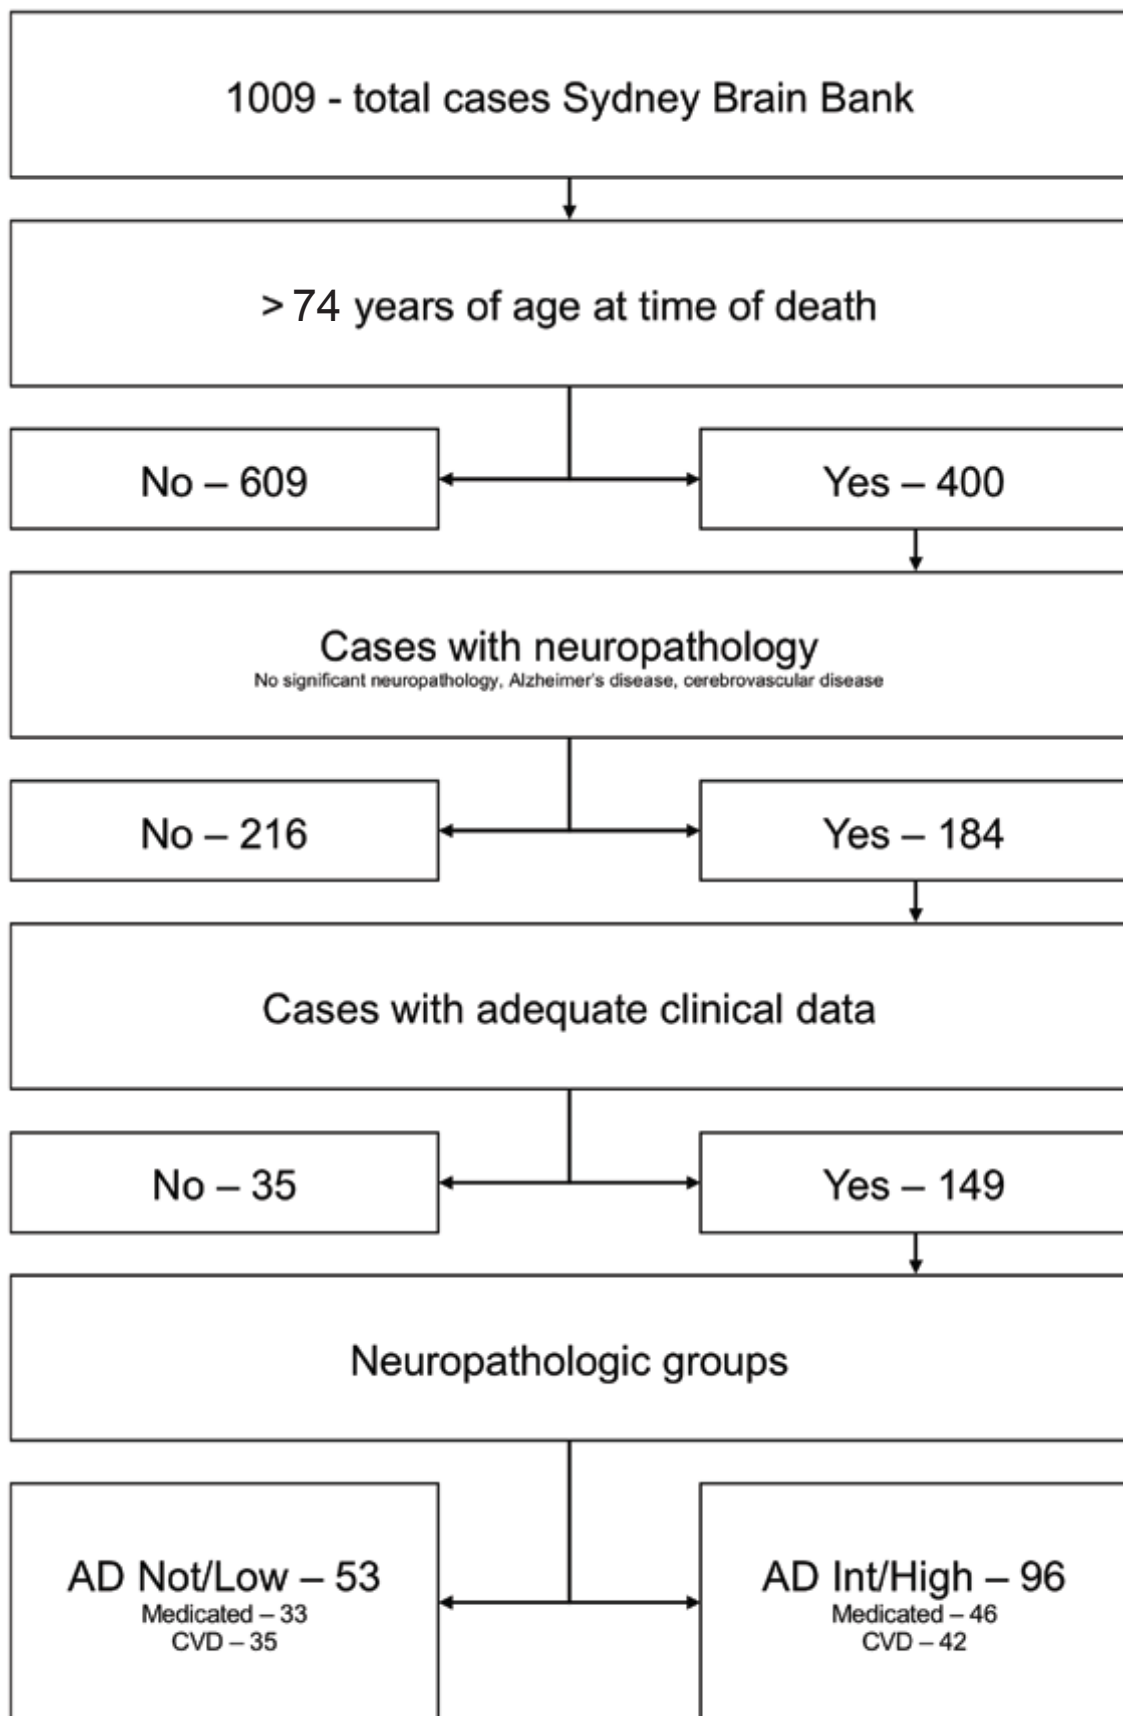

**Supplementary Figure 2.** Venn diagram illustrating the type and number of cases involved in the study and the overlap with variables of interest (AD Change, CVD presence and antihypertensive medication use).

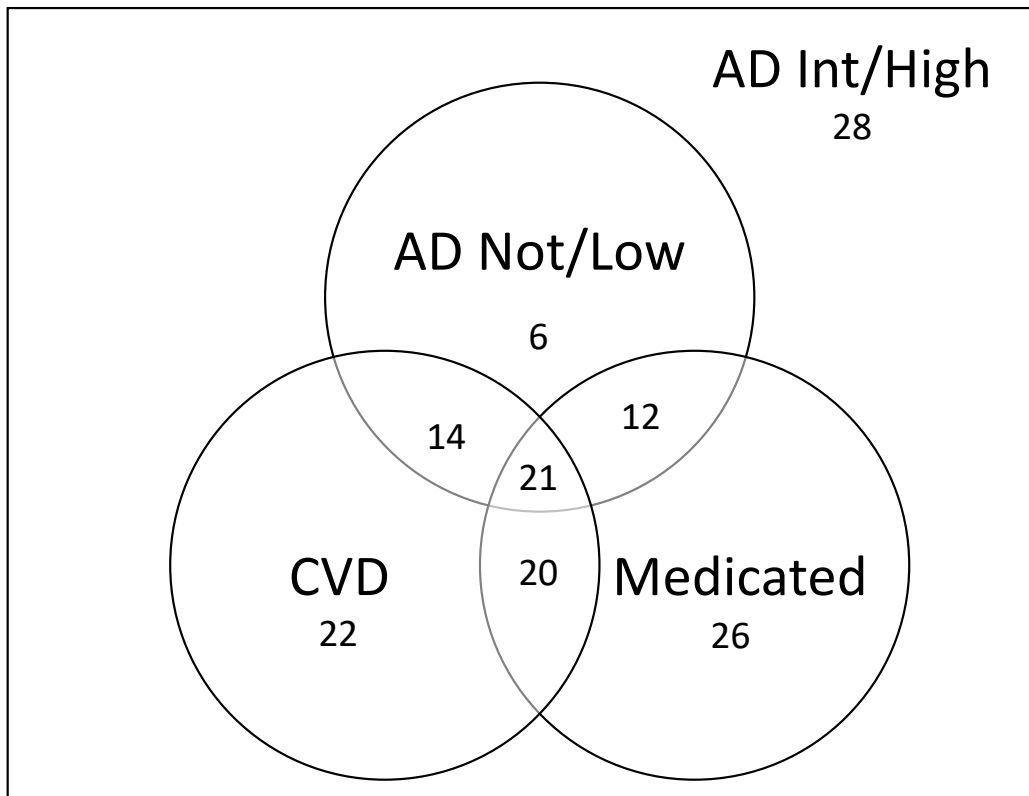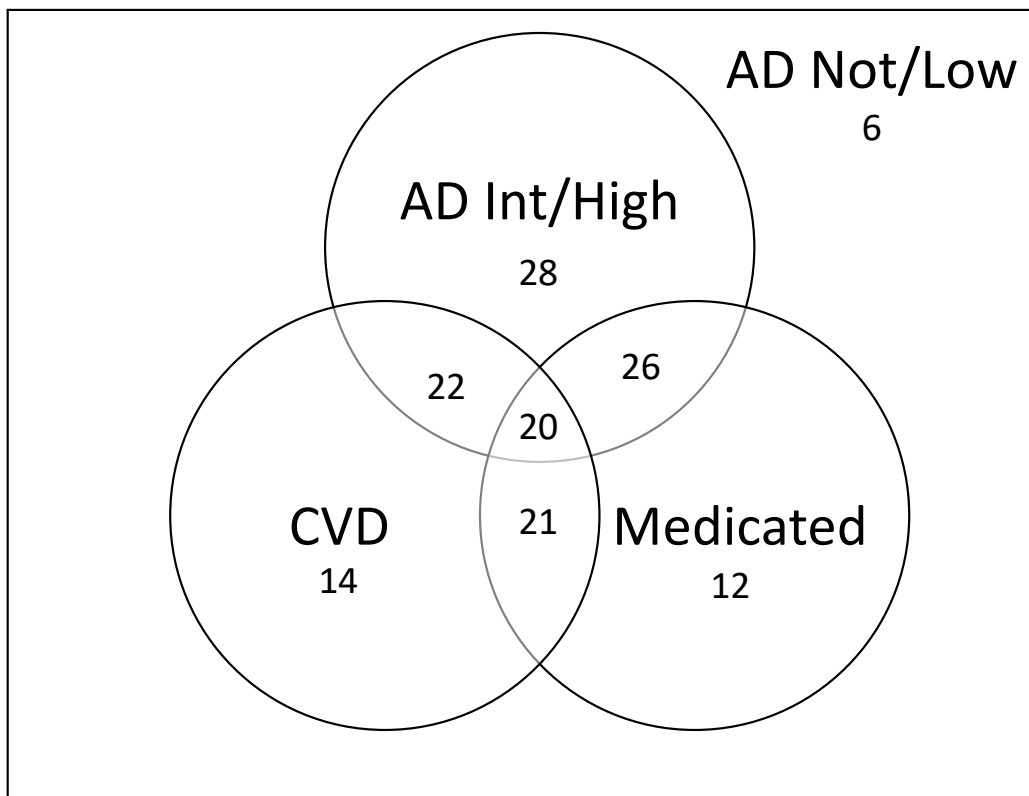

**Supplementary Table 1-** Further break down of table 1 with accompanying statistics

| <b>CDR (n)</b>                                        | <b>0-0.5 (60)</b>                                  | <b>1-3 (89)</b> | <b>0 (51)</b>                 | <b>0.5 (9)</b> | <b>1 (26)</b> | <b>2 (9)</b> | <b>3 (54)</b> |
|-------------------------------------------------------|----------------------------------------------------|-----------------|-------------------------------|----------------|---------------|--------------|---------------|
| AD Intermediate/High, N (%)                           | 26 (43%)                                           | 70 (79%)        | 21 (41%)                      | 5 (55%)        | 20 (77%)      | 5 (55%)      | 45 (83%)      |
|                                                       | $\chi^2(1) = 19.51, p < .001$                      |                 | $\chi^2(4) = 22.84, p < .001$ |                |               |              |               |
| Age at death, mean years (SD)                         | 89.0 (6.1)                                         | 86.5 (5.3)      | 89.1 (6.4)                    | 88.3 (4.0)     | 87.5 (5.5)    | 86.4 (4.0)   | 86.0 (5.3)    |
| Range                                                 | 77 - 103                                           | 76 - 100        | 77 - 103                      | 83 - 93        | 76 - 97       | 81 - 93      | 77 - 100      |
|                                                       | $t(147) = 2.66, p = .02$<br>95% CI = .47, 4.32     |                 | $F(4, 144) = 2.09, p = .09$   |                |               |              |               |
| Male, n (%)                                           | 29 (48)                                            | 31 (35)         | 24 (47)                       | 5 (56)         | 13 (50)       | 5 (56)       | 13 (24)       |
|                                                       | $\chi^2(1) = 2.72, p = .099$                       |                 | $\chi^2(4) = 9.64, p = .047$  |                |               |              |               |
| PMD, mean hours (SD)                                  | 23 (18)                                            | 23 (19)         | 21 (17)                       | 30 (21)        | 23 (16)       | 28 (25)      | 22 (20)       |
|                                                       | $t(147) = -.123, p = .892$<br>95% CI = -.6.6, 5.59 |                 | $F(4, 144) = .609, p = .657$  |                |               |              |               |
| Hypertensive, n (%)                                   | 33 (55%)                                           | 40 (45%)        | 28 (55%)                      | 5 (56%)        | 14 (54%)      | 7 (78%)      | 19 (35%)      |
|                                                       | $\chi^2(1) = 1.45, p = .228$                       |                 | -                             |                |               |              |               |
| Hypertension duration, mean years (SD)                | 16 (10)                                            | 11 (9)          | 16 (11)                       | 18 (5)         | 12 (11)       | 8 (9)        | 11 (7)        |
| n/incomplete data                                     | 28/5                                               | 38/2            | 23/5                          | 5/0            | 12/2          | 7/0          | 19/0          |
|                                                       | $t(64) = 2.307, p = .024$<br>95% CI = 1.21, 9.48   |                 | $F(4, 61) = 1.494, p = .215$  |                |               |              |               |
| Hypertensive and medicated*,<br>n (% of hypertensive) | 28 (85%)                                           | 29 (73%)        | 25 (89%)                      | 3 (60%)        | 13 (93%)      | 3 (43%)      | 13 (68%)      |
|                                                       | $\chi^2(1) = 1.61, p = .204$                       |                 | -                             |                |               |              |               |

| <b>CDR (n)</b>                                              | <b>0-0.5 (60)</b>             | <b>1-3 (89)</b> | <b>0 (51)</b> | <b>0.5 (9)</b> | <b>1 (26)</b> | <b>2 (9)</b> | <b>3 (54)</b> |
|-------------------------------------------------------------|-------------------------------|-----------------|---------------|----------------|---------------|--------------|---------------|
| Normotensive, n (%)                                         | 27 (45%)                      | 49 (55%)        | 23 (45%)      | 4 (44%)        | 12 (46%)      | 2 (22%)      | 35 (65%)      |
|                                                             | $\chi^2(1) = 1.45, p = .228$  |                 | -             |                |               |              |               |
| Normotensive and medicated*,<br>N (% of normotensive)       | 14 (52%)                      | 8 (16%)         | 12 (52%)      | 2 (50%)        | 1 (8%)        | 0            | 7 (20%)       |
|                                                             | $\chi^2(1) = 10.68, p = .001$ |                 | -             |                |               |              |               |
| Cerebrovascular disease and vascular<br>brain injury, n (%) | 29 (48%)                      | 48 (54%)        | 25 (49%)      | 4 (44%)        | 15 (58%)      | 6 (67%)      | 27 (50%)      |
|                                                             | $\chi^2(1) = .450, p = .502$  |                 | -             |                |               |              |               |
| Single infarct (non-lobar), n (% of CVD)                    | 12 (41%)                      | 21 (44%)        | 9 (18%)       | 3 (33%)        | 9 (35%)       | 1 (11%)      | 11 (20%)      |
|                                                             | $\chi^2(1) = .041, p = .839$  |                 | -             |                |               |              |               |
| Multiple infarct (non-lobar), n (% of CVD)                  | 17 (59%)                      | 27 (56%)        | 16 (31%)      | 1 (11%)        | 6 (23%)       | 5 (56%)      | 16 (30%)      |
|                                                             | $\chi^2(1) = .041, p = .839$  |                 | -             |                |               |              |               |

- chi-square expected frequency assumption violated

**Supplementary Table 2-** Breakdown of anti-hypertensive medications data

| <b>Level of AD Neuropathologic Change</b>                                                                               | <b>Not/Low (53)</b>                                   | <b>Intermediate/High (96)</b>                        | <b>Total (149)</b>                                    |
|-------------------------------------------------------------------------------------------------------------------------|-------------------------------------------------------|------------------------------------------------------|-------------------------------------------------------|
| <b>Age at death, mean years (SD)</b>                                                                                    | 89 (6)                                                | 87 (5)                                               | 88 (6)                                                |
| <b>Range</b>                                                                                                            | 77 - 103                                              | 76 - 102                                             | 76 - 103                                              |
| <b>Anti-hypertensive medications, n (%)</b>                                                                             | 33 (62%)                                              | 46 (48%)                                             | 79 (53%)                                              |
| Mean no. of medications taken (range)                                                                                   | 2.3 (1-4)                                             | 2.4 (1-6)                                            | 2.3 (1-6)                                             |
| Mean hypertension duration in yrs (SD)                                                                                  | 16 (10)                                               | 12 (9)                                               | 13 (9)                                                |
| <b>Diuretics, no. of cases taking<br/>(% of anti-hypertensive medicated)</b>                                            | 23 (70%)                                              | 27 (59%)                                             | 50 (63%)                                              |
| Top 3 most commonly taken Diuretics                                                                                     | Lasix<br>Frusemide<br>Uremide                         | Lasix<br>Frusemide<br>NatriliX                       | Lasix<br>Frusemide<br>NatriliX                        |
| Mean dose in mg/day (range)                                                                                             | 40 (3 – 80)<br>10 instances of missing dosage data    | 41 (2.5 – 225)<br>9 instances of missing dosage data | 41 (2.5 – 225)<br>19 instances of missing dosage data |
| Total number of diuretics taken                                                                                         | 31 (6 cases taking >1)                                | 35 (9 cases taking >1)                               | 66 (15 cases taking >1)                               |
| <b>Beta Blockers, no. of cases taking<br/>(% of anti-hypertensive medicated)</b>                                        | 14 (42%)                                              | 20 (44%)                                             | 34 (43%)                                              |
| Top 3 most commonly taken Beta Blockers                                                                                 | Betaloc<br>Metoprolol<br>Atenolol                     | Betaloc<br>Metoprolol<br>Inderal/Noten/ Tenormin     | Betaloc<br>Metoprolol<br>Inderal/Noten/Atenolol       |
| Mean dose in mg/day (range)                                                                                             | 49 (1.25 – 100)<br>1 instances of missing dosage data | 68 (5 – 200)<br>5 instances of missing dosage data   | 60 (1.25 – 200)<br>6 instances of missing dosage data |
| Total number of beta blockers taken                                                                                     | 16 (2 cases taking >1)                                | 26 (5 cases taking >1)                               | 42 (7 cases taking >1)                                |
| <b>Angiotensin Converting Enzyme Inhibitors (ACE-I),<br/>no. of cases taking<br/>(% of anti-hypertensive medicated)</b> | 14 (42%)                                              | 18 (39%)                                             | 32 (41%)                                              |
| Top 3 most commonly taken ACE-Is                                                                                        | Captopril<br>Coversyl/Prinivil/Tritace                | Tritace<br>Coversyl<br>Enalpril/Renitec              | Tritace<br>Captopril<br>Prinivil/Renitec              |
| Mean dose in mg/day (range)                                                                                             | 14 (1.25 – 75)<br>instances of missing dosage data    | 10 (2.5 – 40)<br>instances of missing dosage data    | 12 (1.25 – 75)<br>7 instances of missing dosage data  |
| Total number of ACE-Is taken                                                                                            | 15 (1 cases taking >1)                                | 18 (0 cases taking >1)                               | 33 (1 cases taking >1)                                |

| <b>Level of AD Neuropathologic Change</b>                                                               | <b>Not/Low (53)</b>                                  | <b>Intermediate/High (96)</b>                        | <b>Total (149)</b>                                    |
|---------------------------------------------------------------------------------------------------------|------------------------------------------------------|------------------------------------------------------|-------------------------------------------------------|
| <b>Calcium Channel Blockers (CCBs)</b> , no. of cases taking<br>(% of anti-hypertensive medicated)      | 9 (27%)                                              | 18 (39%)                                             | 27 (34%)                                              |
| Top 3 most commonly taken CCBs                                                                          | Adalat<br>Cardizem<br>Isoptin/Anpec                  | Adalat<br>Isoptin/Norvasc<br>Cardizem/Zanidip        | Adalat<br>Cardizem<br>Isoptin                         |
| Mean dose in mg/day (range)                                                                             | 150 (90 – 180)<br>6 instances of missing dosage data | 80 (2.5 – 240)<br>4 instances of missing dosage data | 91 (2.5 – 240)<br>10 instances of missing dosage data |
| Total number of CCBs taken                                                                              | 9 (0 cases taking >1)                                | 20 (2 cases taking >1)                               | 29 (2 cases taking >1)                                |
| <b>Angiotensin Receptor Blockers (ARBs)</b> , no. of cases taking<br>(% of anti-hypertensive medicated) | 0                                                    | 11 (24%)                                             | 11 (14%)                                              |
| Top 3 most commonly taken ARBs                                                                          | -                                                    | Avapro<br>Micardis<br>Atacand                        | Avapro<br>Micardis<br>Atacand                         |
| Mean dose in mg/day (range)                                                                             | -                                                    | 141 (8 – 450)<br>2 instances of missing dosage data  | 141 (8 – 450)<br>2 instances of missing dosage data   |
| Total number of ARBs taken                                                                              | -                                                    | 11 (0 cases taking >1)                               | 11 (0 cases taking >1)                                |

**Supplementary Table 3-** Demographic and clinic-pathological profile of cases (with statistics) of the main group and experimental laboratory work subsets

|                                          | Original                                 |            | Western analysis                        |            | IHC analysis                           |            |
|------------------------------------------|------------------------------------------|------------|-----------------------------------------|------------|----------------------------------------|------------|
| Clinical Dementia Rating (n)             | 0 - 0.5 (60)                             | 1 - 3 (89) | 0 - 0.5 (18)                            | 1 - 3 (26) | 0 - 0.5 (33)                           | 1 - 3 (25) |
| AD intermediate/high level change, n (%) | 26 (43%)                                 | 70 (79%)   | 4 (22%)                                 | 26 (100%)  | 9 (27%)                                | 15 (60%)   |
|                                          | $\chi^2(1) = 19.51, p < .001$            |            | $\chi^2(1) = 29.66, p < .001$           |            | $\chi^2(1) = 6.28, p = .01$            |            |
| Age at death, mean years (SD)            | 89 (6)                                   | 87 (5)     | 88 (6)                                  | 88 (8)     | 89 (6)                                 | 90 (5)     |
| Range                                    | 77 - 103                                 | 76 - 100   | 78 - 101                                | 75 - 100   | 77 - 103                               | 80 - 100   |
|                                          | t(147) = 2.66, p = .02<br>[.47, 4.32]    |            | t(42) = .004, p = 1.00<br>[-4.00, 4.20] |            | t(56) = -.56, p = .58<br>[-3.82, 1.92] |            |
| Male, n (%)                              | 29 (48%)                                 | 31 (35%)   | 7 (39%)                                 | 11 (42%)   | 17 (52%)                               | 10 (40%)   |
|                                          | $\chi^2(1) = 2.72, p = .10$              |            | $\chi^2(1) = .05, p = .82$              |            | $\chi^2(1) = .76, p = .38$             |            |
| PMD, mean hours (SD)                     | 23 (18)                                  | 23 (19)    | 19 (12)                                 | 15 (10)    | 25 (20)                                | 17 (13)    |
|                                          | t(147) = -.12, p = .89<br>[-6.60., 5.59] |            | t(42) = 1.17, p = .25<br>[-2.11, 11.00] |            | t(56) = 1.73, p = .09<br>[-.89, 16.58] |            |
| Hypertensive, n (%)                      | 33 (55%)                                 | 40 (45%)   | 11 (61%)                                | 12 (46%)   | 20 (61%)                               | 16 (64%)   |
|                                          | $\chi^2(1) = 1.45, p = .23$              |            | $\chi^2(1) = .95, p = .33$              |            | $\chi^2(1) = .07, p = .79$             |            |



|                                                             | Original                               |          | Western analysis                       |           | IHC analysis                           |          |
|-------------------------------------------------------------|----------------------------------------|----------|----------------------------------------|-----------|----------------------------------------|----------|
| Hypertension duration, mean years (SD)                      | 16 (10)^                               | 11 (9)^  | 17 (15)                                | 14 (11)   | 15 (9)                                 | 16 (9)   |
|                                                             | t(64) = 2.31, p = .03<br>[.98, 10.01.] |          | t(21) = .36, p = .72<br>[-6.87, 11.77] |           | t(31) = -.25, p = .82<br>[-8.09, 5.78] |          |
| Hypertensive and medicated*,<br>n (% of hypertensive)       | 28 (85%)                               | 29 (73%) | 10 (91%)                               | 12 (100%) | 16 (80%)                               | 13 (81%) |
|                                                             | $\chi^2(1) = 1.61, p = .20$            |          | -                                      |           | -                                      |          |
| Normotensive, n (%)                                         | 27 (45%)                               | 49 (55%) | 7 (39%)                                | 14 (54%)  | 13 (39%)                               | 9 (36%)  |
|                                                             | $\chi^2(1) = 1.45, p = .23$            |          | $\chi^2(1) = .95, p = .33$             |           | $\chi^2(1) = .07, p = .79$             |          |
| Normotensive and medicated*,<br>n (% of normotensive)       | 14 (52%)                               | 8 (16%)  | 0                                      | 0         | 10 (77%)                               | 3 (33%)  |
|                                                             | $\chi^2(1) = 10.68, p = .001$          |          | N/A                                    |           | $\chi^2(1) = 4.18, p = .04$            |          |
| Cerebrovascular disease and<br>vascular brain injury, n (%) | 29 (48%)                               | 48 (54%) | 4 (22%)                                | 7 (27%)   | 18 (55%)                               | 18 (72%) |
|                                                             | $\chi^2(1) = .45, p = .50$             |          | $\chi^2(1) = .01, p = .91$             |           | $\chi^2(1) = 1.84, p = .18$            |          |

|                                                 | Original                   |          | Western analysis |          | IHC analysis                |          |
|-------------------------------------------------|----------------------------|----------|------------------|----------|-----------------------------|----------|
| Single infarct (non-lobar), n (% of infarct)    | 12 (41%)                   | 21 (44%) | 3 (75%)          | 0        | 8 (44%)                     | 5 (28%)  |
|                                                 | $\chi^2(1) = .04, p = .84$ |          | -                |          | $\chi^2(1) = 1.08, p = .30$ |          |
| Multiple infarcts (non-lobar), n (% of infarct) | 17 (59%)                   | 27 (56%) | 1 (25%)          | 7 (100%) | 10 (56%)                    | 13 (72%) |
|                                                 | $\chi^2(1) = .04, p = .84$ |          | -                |          | $\chi^2(1) = 1.08, p = .30$ |          |

“–“ chi-square expected frequency assumption violated

**Supplementary Table 4-** Multinomial logistic regression statistics

|                                                                                                                                | <i>b</i> (SE) | 95% CI for Odds Ratio |            |       |
|--------------------------------------------------------------------------------------------------------------------------------|---------------|-----------------------|------------|-------|
|                                                                                                                                |               | Lower                 | Odds Ratio | Upper |
| <b>A0/A1 (none/cortical abeta deposition) vs. Reference category - A3 (cortical, striatal and nigral abeta deposition)</b>     |               |                       |            |       |
| Medicated**                                                                                                                    | 2.01 (0.68)   | 1.98                  | 7.43       | 27.87 |
| Hypertensive                                                                                                                   | -0.18 (0.58)  | 0.27                  | 0.84       | 2.59  |
| CVD                                                                                                                            | 0.95 (0.56)   | 0.87                  | 2.59       | 7.73  |
| Age                                                                                                                            | 0.06 (0.05)   | 0.96                  | 1.06       | 1.17  |
| Gender (Male)                                                                                                                  | 0.50 (0.54)   | 0.57                  | 1.66       | 4.80  |
| Post mortem delay                                                                                                              | 0.02 (0.01)   | 1.00                  | 1.02       | 1.05  |
| Intercept*                                                                                                                     | -9.30 (4.56)  |                       |            |       |
| <b>A2 (cortical and striatal abeta deposition) vs. Reference category- A3 (cortical, striatal and nigral abeta deposition)</b> |               |                       |            |       |
| Medicated*                                                                                                                     | 1.12 (0.54)   | 1.05                  | 3.05       | 8.86  |
| Hypertensive                                                                                                                   | 0.02 (0.52)   | 0.37                  | 1.02       | 2.80  |
| CVD*                                                                                                                           | 1.11 (0.50)   | 1.15                  | 3.02       | 7.98  |
| Age*^                                                                                                                          | 0.09 (0.04)   | 1.01                  | 1.10       | 1.19  |
| Gender (male)                                                                                                                  | 0.28 (0.48)   | 0.52                  | 1.33       | 3.40  |
| Post mortem delay                                                                                                              | 0.00 (0.01)   | 0.98                  | 1.00       | 1.03  |
| Intercept**                                                                                                                    | -10.98 (3.84) |                       |            |       |

Note.  $R^2 = .19$  (Cox & Snell),  $.23$  (Nagelkerke). Model  $\chi^2(12) = 30.92$ ,  $p = .002$ , \* $p < .05$ , \*\* $p < .01$ , \*\*\* $p < .001$ , ^ = no main effect.

|                                                                                         |               | 95% CI for Odds Ratio |            |       |
|-----------------------------------------------------------------------------------------|---------------|-----------------------|------------|-------|
|                                                                                         | <i>b (SE)</i> | Lower                 | Odds Ratio | Upper |
| <b>B0 (none) vs. Reference category B3 (Braak NFT stage V or VI)</b>                    |               |                       |            |       |
| Medicated*                                                                              | 1.46 (0.67)   | 1.15                  | 4.30       | 16.03 |
| Hypertensive                                                                            | -0.84 (0.68)  | 0.12                  | 0.43       | 1.64  |
| CVD                                                                                     | 0.13 (0.58)   | 0.36                  | 1.14       | 3.58  |
| Age*^                                                                                   | 0.11 (0.05)   | 1.01                  | 1.12       | 1.23  |
| Gender (male)                                                                           | 0.89 (0.63)   | 0.70                  | 2.43       | 8.40  |
| Post mortem delay                                                                       | 0.05 (0.02)   | 0.98                  | 1.01       | 1.04  |
| Intercept*                                                                              | -11.58 (4.58) |                       |            |       |
| <b>B1 (Braak NFT stage I or II) vs. Reference category B3 (Braak NFT stage V or VI)</b> |               |                       |            |       |
| Medicated*                                                                              | 1.18 (0.59)   | 1.01                  | 3.24       | 10.37 |
| Hypertensive                                                                            | 0.32 (0.58)   | 0.44                  | 1.37       | 4.28  |
| CVD                                                                                     | 1.09 (0.56)   | 0.99                  | 2.96       | 8.85  |
| Age                                                                                     | 0.09 (0.05)   | 0.99                  | 1.09       | 1.20  |
| Gender (male)*                                                                          | 1.42 (0.56)   | 1.39                  | 4.14       | 12.35 |
| Post mortem delay                                                                       | 0.01 (0.01)   | 0.98                  | 1.01       | 1.04  |
| Intercept*                                                                              | -10.54 (4.33) |                       |            |       |
|                                                                                         |               | 95% CI for Odds Ratio |            |       |
|                                                                                         | <i>b (SE)</i> | Lower                 | Odds Ratio | Upper |

| <b>B2 (Braak NFT stage III or IV) vs. Reference category B3 (Braak NFT stage V or VI)</b> |              |      |      |       |
|-------------------------------------------------------------------------------------------|--------------|------|------|-------|
| Medicated*                                                                                | 1.33 (0.52)  | 1.37 | 3.77 | 10.37 |
| Hypertensive                                                                              | 0.20 (0.50)  | 0.45 | 1.22 | 3.27  |
| CVD                                                                                       | 0.06 (0.45)  | 0.44 | 1.06 | 2.57  |
| Age                                                                                       | 0.06 (0.04)  | 0.98 | 1.06 | 1.15  |
| Gender (male)**                                                                           | 1.575(0.49)  | 1.81 | 4.72 | 12.33 |
| Post mortem delay                                                                         | -0.01 (0.01) | 0.97 | 0.99 | 1.02  |
| Intercept                                                                                 | -6.37 (3.66) |      |      |       |

Note.  $R^2 = .25$  (Cox & Snell),  $.27$  (Nagelkerke). Model  $\chi^2(18) = 42.41, p = .001, *p < .05, ** p < .01, *** p < .001, ^ =$  no main effect.
